# Supplementary material for: Dieckol Reduces Muscle Atrophy by Modulating Angiotensin Type II Type 1 Receptor and NADPH Oxidase in Spontaneously Hypertensive Rats
Source: MDPI journal article supplement (doi:10.3390/antiox10101561), 2021-09-30
Supplement: s1 [file s1]

# Dieckol reduces muscle atrophy by modulating angiotensin type II type 1 receptor and NADPH oxidase in spontaneously hypertensive rats

Seyeon Oh <sup>1</sup>, Jin Young Yang <sup>1</sup>, Chul Hyun Park <sup>2</sup>, Kuk Hui Son <sup>2,\*</sup> and Kyunghee Byun <sup>1,3,\*</sup>

<sup>1</sup> Functional Cellular Networks Laboratory, College of Medicine, Department of Medicine, Graduate School and Lee Gil Ya Cancer and Diabetes Institute, Gachon University, Incheon 21999, Republic of Korea; seyeon8965@gmail.com (S.O.); roswellgirl111@gmail.com (J.Y.Y.)

<sup>2</sup> Department of Thoracic and Cardiovascular Surgery, Gachon University Gil Medical Center, Gachon University, Incheon 21565, Republic of Korea; cdgpch@gilhospital.com (C.H.P.)

<sup>3</sup> Department of Anatomy & Cell Biology, Gachon University College of Medicine, Incheon 21936, Republic of Korea

\* Correspondence: dr632@gilhospital.com; Tel.: +82-32-460-3666, khbyun1@gachon.ac.kr; Tel.: +82-32-899-6511

## Supplementary Tables

**Table S1. List of primer for qRT-PCR used in this study.**

| Gene                           |         | Primers                               |
|--------------------------------|---------|---------------------------------------|
| <i>actb</i>                    | Forward | 5'- CCG TAA AGA CCT CTA TGC CAA C -3' |
|                                | Reverse | 5'- GGC AGT AAT CTC CTT CTG CAT C -3' |
| <i>AT1R</i>                    | Forward | 5'- CAT GAT CCC TAC CCT CTA CAG C -3' |
|                                | Reverse | 5'- TAA ATG ACA ATC ACC ACC AAG C -3' |
| <i>P300</i>                    | Forward | 5'- TGG TCC TCT ACC TGA TCC ATC T -3' |
|                                | Reverse | 5'- CAT CTG TCC AAA CTG GTT CAA A -3' |
| <i>STAT3</i>                   | Forward | 5'- AAA GTC AGG TTG CTG GTC AAA T -3' |
|                                | Reverse | 5'- CCA GAG TCC TTA TCA ATG CAC A -3' |
| <i>ROR<math>\gamma</math>t</i> | Forward | 5'- AGA AGG ACT CCT ATG TGG GTG A -3' |
|                                | Reverse | 5'- TGG TAA CAA TGC CAT GTT CAA T -3' |
| <i>FOXP3</i>                   | Forward | 5'- AGT TCC TTC CCA GAG TTC TTC C -3' |
|                                | Reverse | 5'- GAT AAG GGT GGC ATA GGT GAA A -3' |
| <i>NF-<math>\kappa</math>B</i> | Forward | 5'- GCA GTT TGA TGC TGA TGA AGA C -3' |
|                                | Reverse | 5'- ACT CTG AGT TGT CCA CAG ATG C -3' |
| <i>IL-1<math>\beta</math></i>  | Forward | 5'- AGT GTG GAT CCC AAA CAA TAC C -3' |
|                                | Reverse | 5'- TGT GCA GAC TCA AAC TCC ACT T -3' |
| <i>TNF-<math>\alpha</math></i> | Forward | 5'- CAT GGA TCT CAA AGA CAA CCA A -3' |
|                                | Reverse | 5'- CCT TGA AGA GAA CCT GGG AGT A -3' |
| <i>MURF-1</i>                  | Forward | 5'- TCG ACA TCT ACA AGC AGG AAT G -3' |
|                                | Reverse | 5'- GAT TTT CTC GTC TTC GTG TTC C -3' |
| <i>Atrogin-1</i>               | Forward | 5'- TGA AAG TTC TTG AAG ACC AGC A -3' |
|                                | Reverse | 5'- GCG TGC ATA AGG ATG TGT AGA G -3' |
| <i>MyoD</i>                    | Forward | 5'- CTC TGA TGG CAT GAT GGA TTA C -3' |
|                                | Reverse | 5'- GCT GGA CGC CTC ACT GTA GTA -3'   |
